# Supplementary material for: Leveraging SARS-CoV-2 Main Protease (Mpro) for COVID-19 Mitigation with Selenium-Based Inhibitors
Source: MDPI journal article supplement (doi:10.3390/ijms25020971), 2024-01-12
Supplement: s1 [file s1]

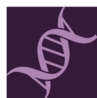

Supplementary Materials

# Leveraging SARS-CoV-2 Main Protease (M<sup>pro</sup>) for COVID-19 Mitigation with Selenium-Based Inhibitors

Viviana De Luca <sup>1†</sup>, Andrea Angeli <sup>2†</sup>, Alessio Nocentini <sup>2</sup>, Paola Gratterer <sup>2</sup>, Silvia Pratesi <sup>3</sup>, Damiano Tanini <sup>3</sup>, Vincenzo Carginale <sup>1</sup>, Antonella Capperucci <sup>3</sup>, Claudiu T. Supuran <sup>2\*</sup> and Clemente Capasso <sup>1,\*</sup>

<sup>1</sup> Department of Biology, Agriculture and Food Sciences, National Research Council (CNR), Institute of Biosciences and Bioresources, 80131 Naples, Italy; viviana.deluca@ibbr.cnr.it (V.D.L.); vincenzo.carginale@cnr.it (V.C.)

<sup>2</sup> Neurofarba Department, Pharmaceutical and Nutraceutical Section, Laboratory of Molecular Modeling Cheminformatics & QSAR, University of Florence, Via Ugo Schiff 6, Sesto Fiorentino, 50019 Florence, Italy; andrea.angeli@unifi.it (A.A.); alessio.nocentini@unifi.it (A.N.); paola.gratterer@unifi.it (P.G.)

<sup>3</sup> Department of Chemistry “Ugo Schiff”, University of Florence, Via Della Lastruccia 3-13, Sesto Fiorentino, 50019 Florence, Italy; silvia.pratesi1@stud.unifi.it (S.P.); damiano.tanini@unifi.it (D.T.); antonella.capperucci@unifi.it (A.C.)

\* Correspondence: claudiu.supuran@unifi.it (C.T.S.); clemente.capasso@ibbr.cnr.it (C.C.)

## Index

<sup>1</sup>H, <sup>13</sup>C <sup>77</sup>Se Spectra of compounds **1a**, **2a-c** and **3a-c**

S2–S8

**Citation:** De Luca, V.; Angeli, A.; Nocentini, A.; Gratterer, P.; Pratesi, S.; Tanini, D.; Carginale, V.; Capperucci, A.; Supuran, C.T.; Capasso, C. Leveraging SARS-CoV-2 Main Protease (M<sup>pro</sup>) for COVID-19 Mitigation with Selenium-Based Inhibitors. *Int. J. Mol. Sci.* **2024**, *25*, 971. <https://doi.org/10.3390/ijms25020971>

Academic Editor: Barbara Ruaro

Received: 7 December 2023

Revised: 5 January 2024

Accepted: 9 January 2024

Published: 12 January 2024

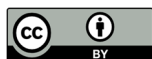

**Copyright:** © 2024 by the authors. Licensee MDPI, Basel, Switzerland. This article is an open access article distributed under the terms and conditions of the Creative Commons Attribution (CC BY) license (<https://creativecommons.org/licenses/by/4.0/>).

## Copy of NMR Spectra of synthesised compounds

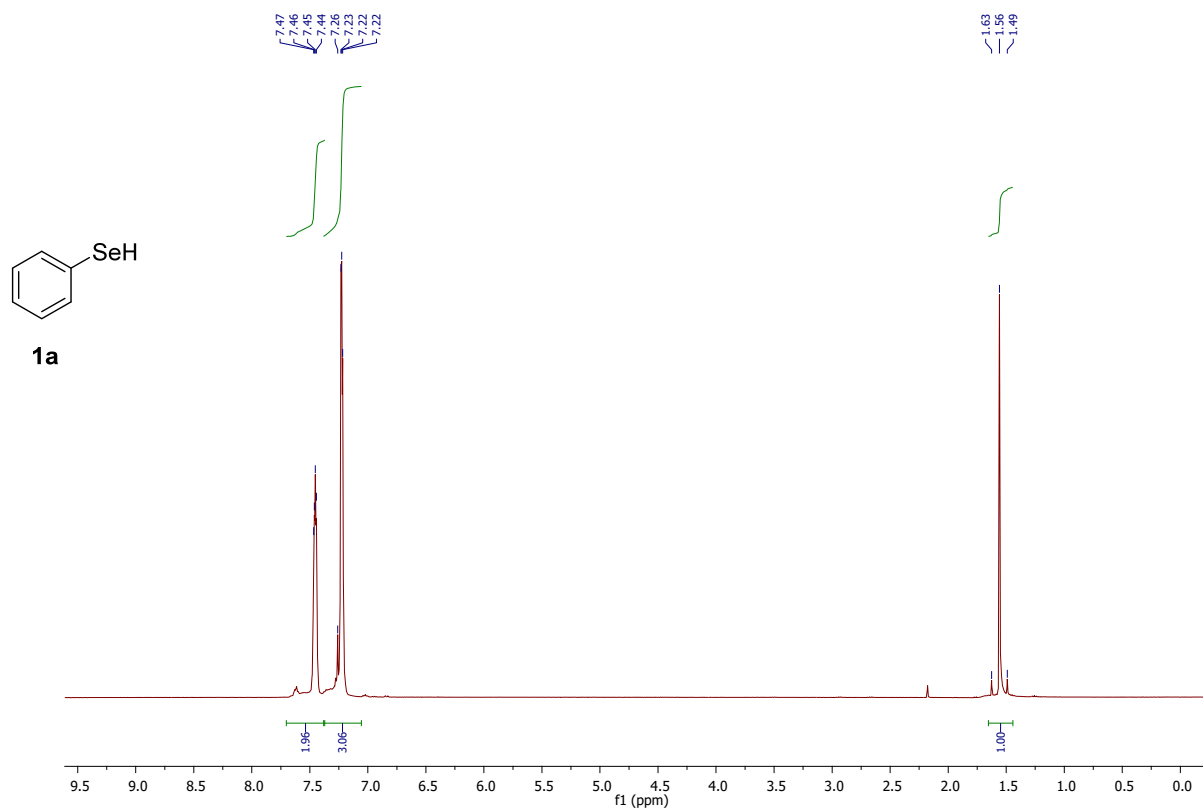**Figure S1.** <sup>1</sup>H NMR Spectrum of compound **1a** (CDCl<sub>3</sub>, 400 MHz).

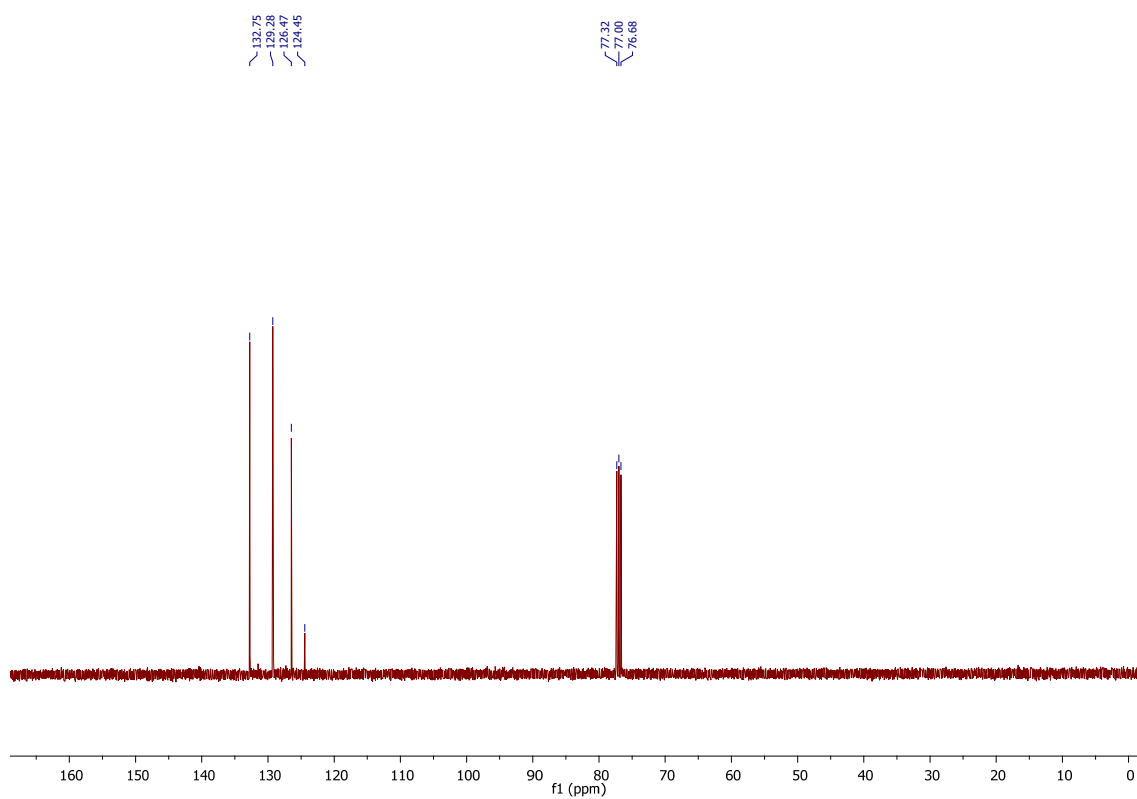

**Figure S2.**  $^{13}\text{C}$  NMR Spectrum of compound **1a** ( $\text{CDCl}_3$ , 100 MHz).

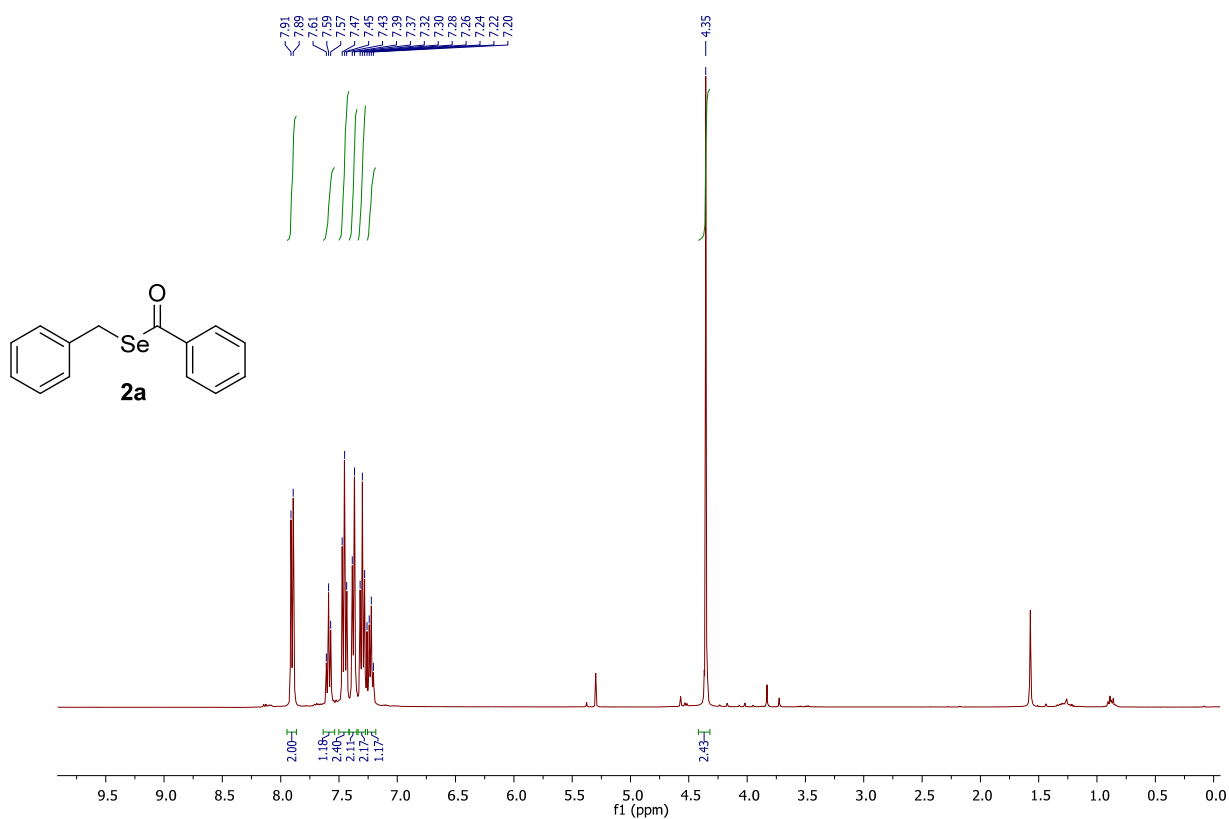Figure S3. <sup>1</sup>H NMR Spectrum of compound **2a** (CDCl<sub>3</sub>, 400 MHz).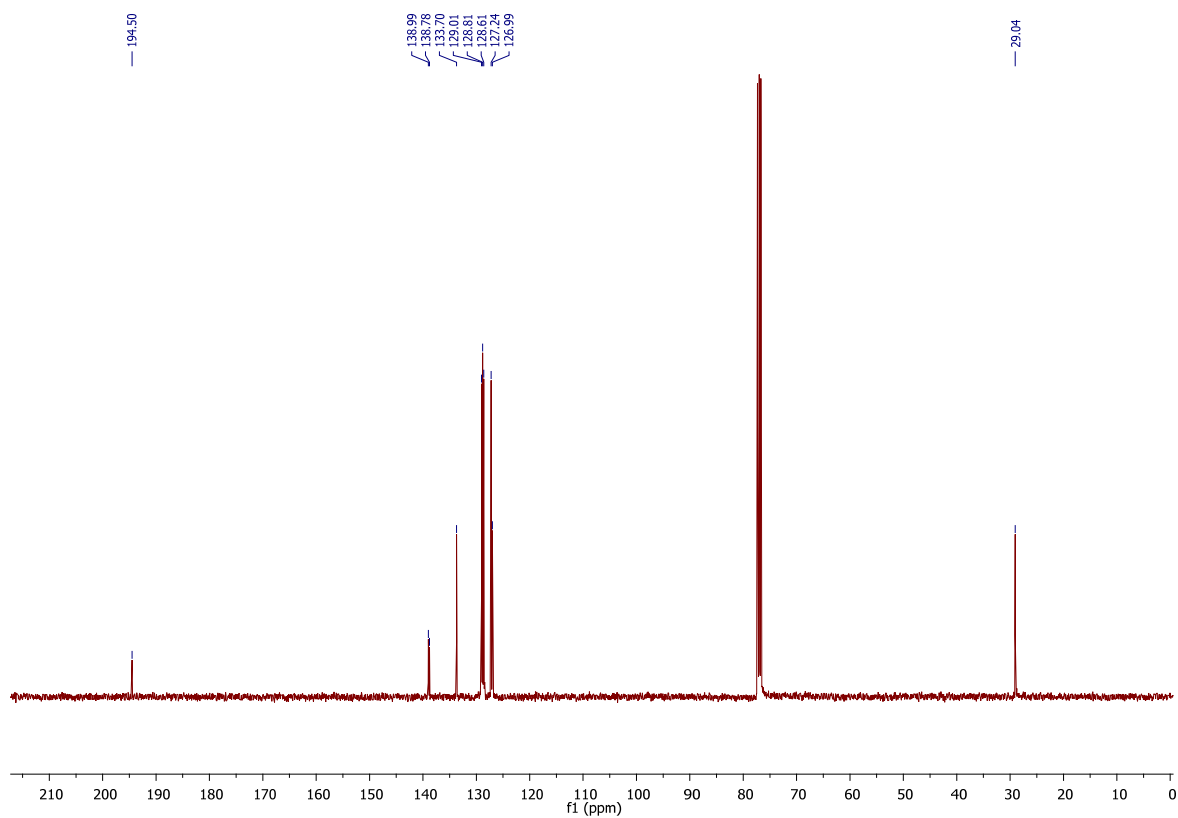Figure S4. <sup>13</sup>C NMR Spectrum of compound **2a** (CDCl<sub>3</sub>, 100 MHz).

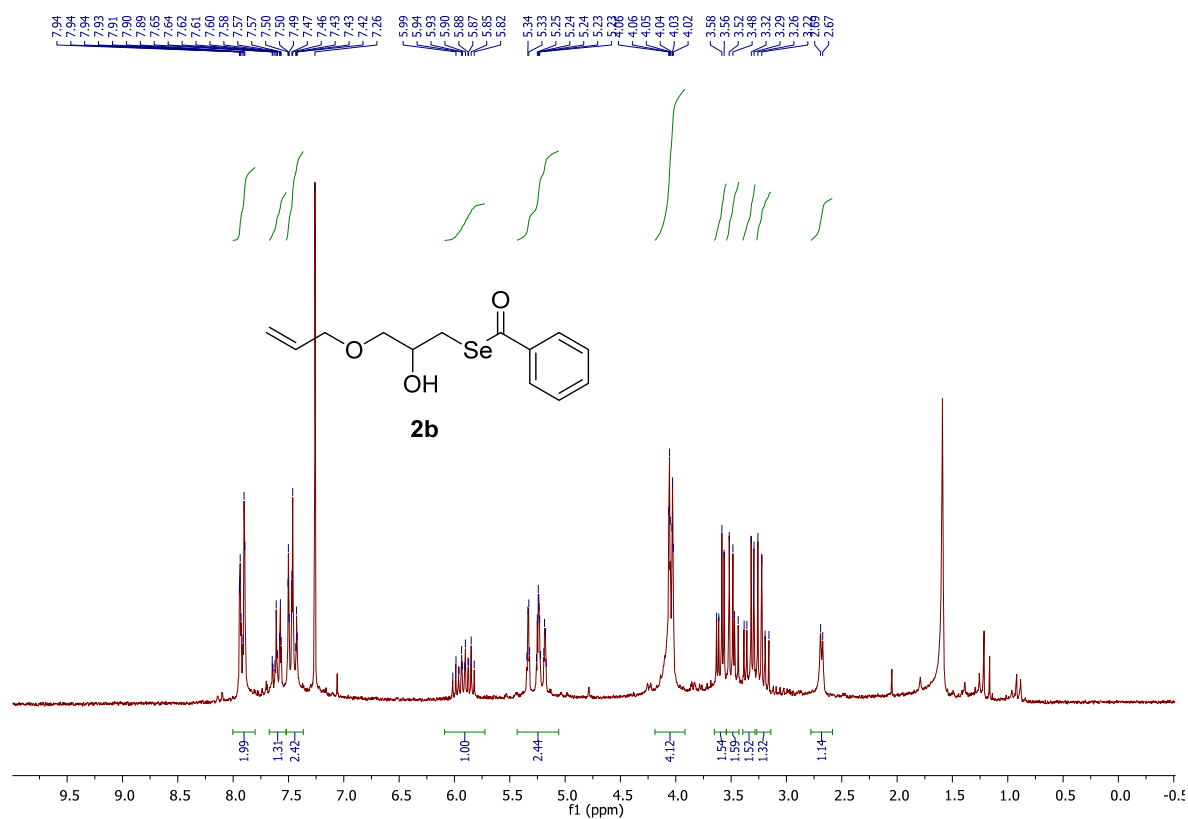Figure S5. <sup>1</sup>H NMR Spectrum of compound **2b** (CDCl<sub>3</sub>, 200 MHz).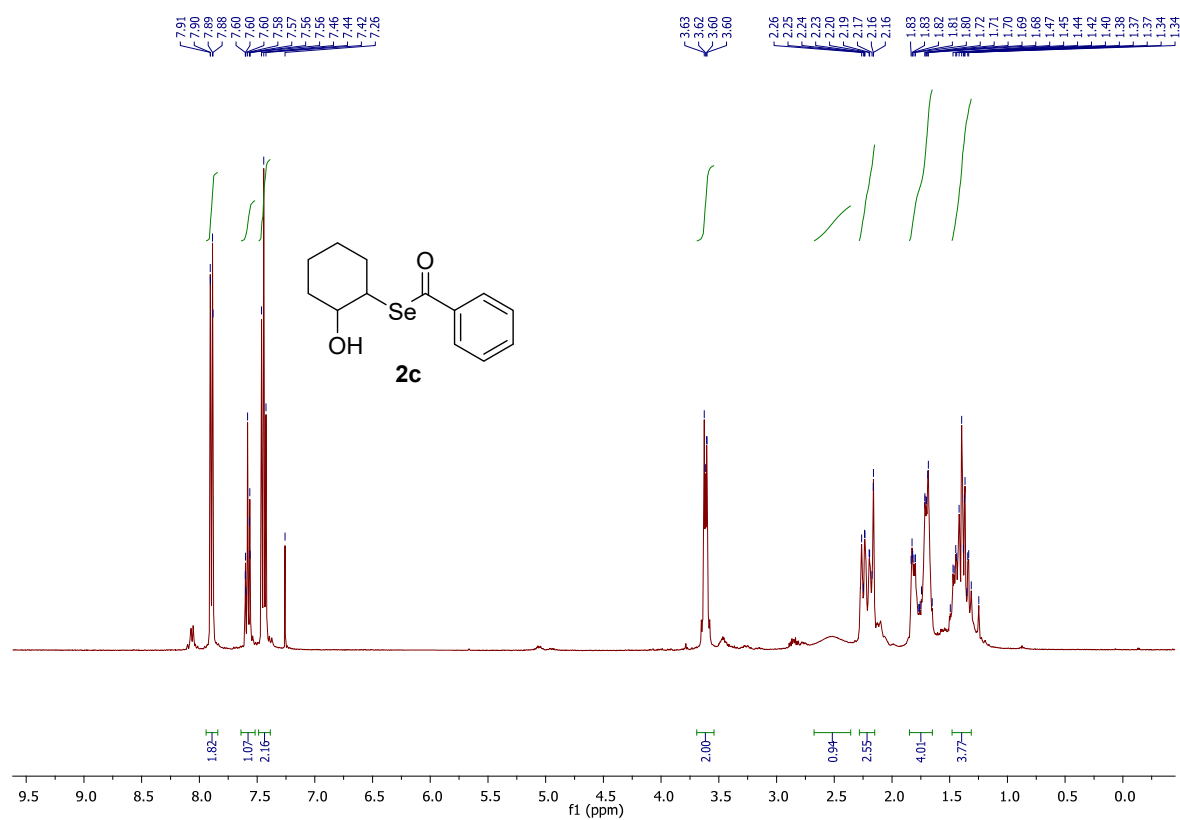Figure S6. <sup>1</sup>H NMR Spectrum of compound **2c** (CDCl<sub>3</sub>, 400 MHz).

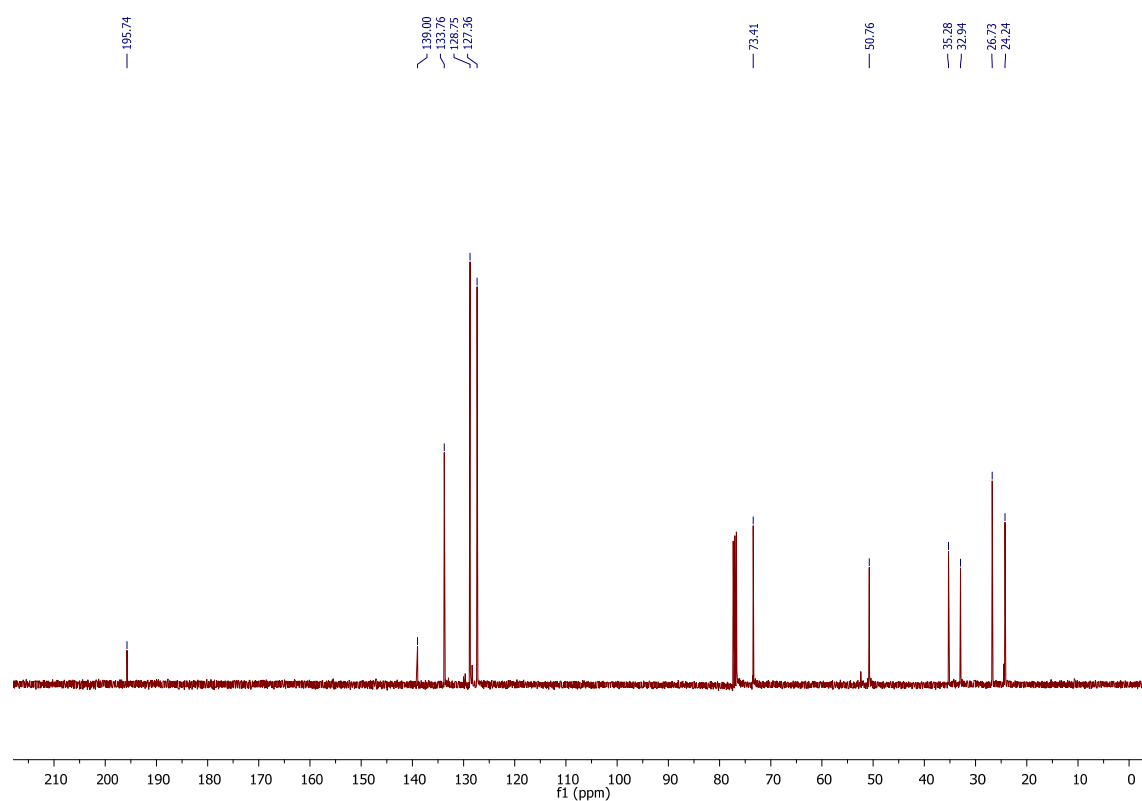Figure S7. <sup>13</sup>C NMR Spectrum of compound **2c** (CDCl<sub>3</sub>, 100 MHz).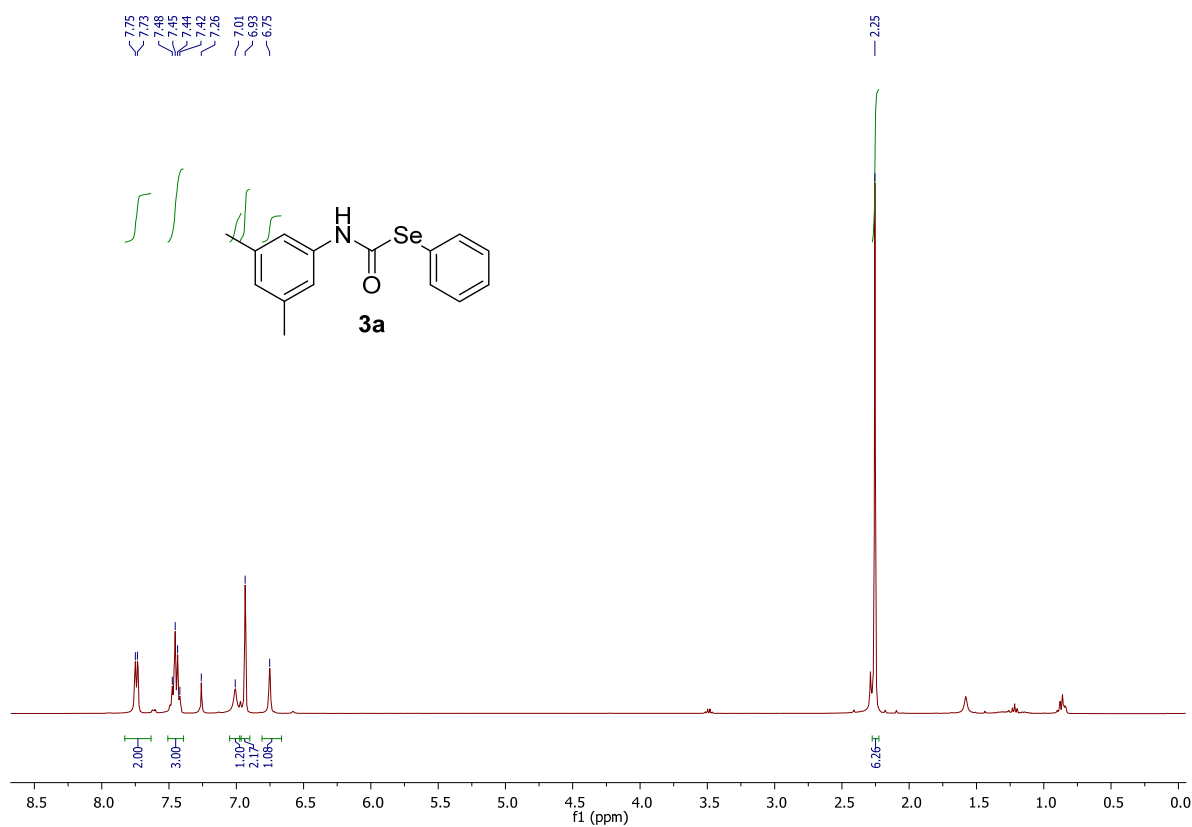Figure S8. <sup>1</sup>H NMR spectrum of compound **3a** (CDCl<sub>3</sub>, 400 MHz).

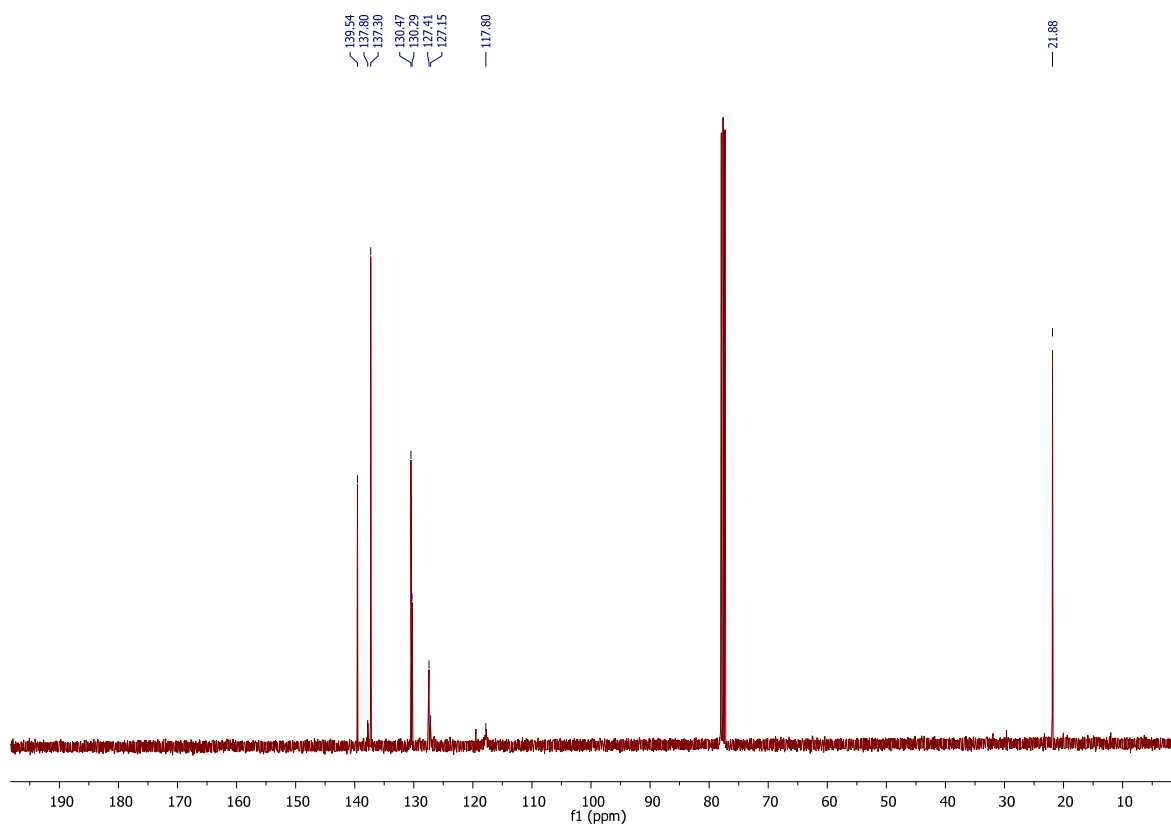

**Figure S9.**  $^{13}\text{C}$  NMR spectrum of compound **3a** ( $\text{CDCl}_3$ , 100 MHz).

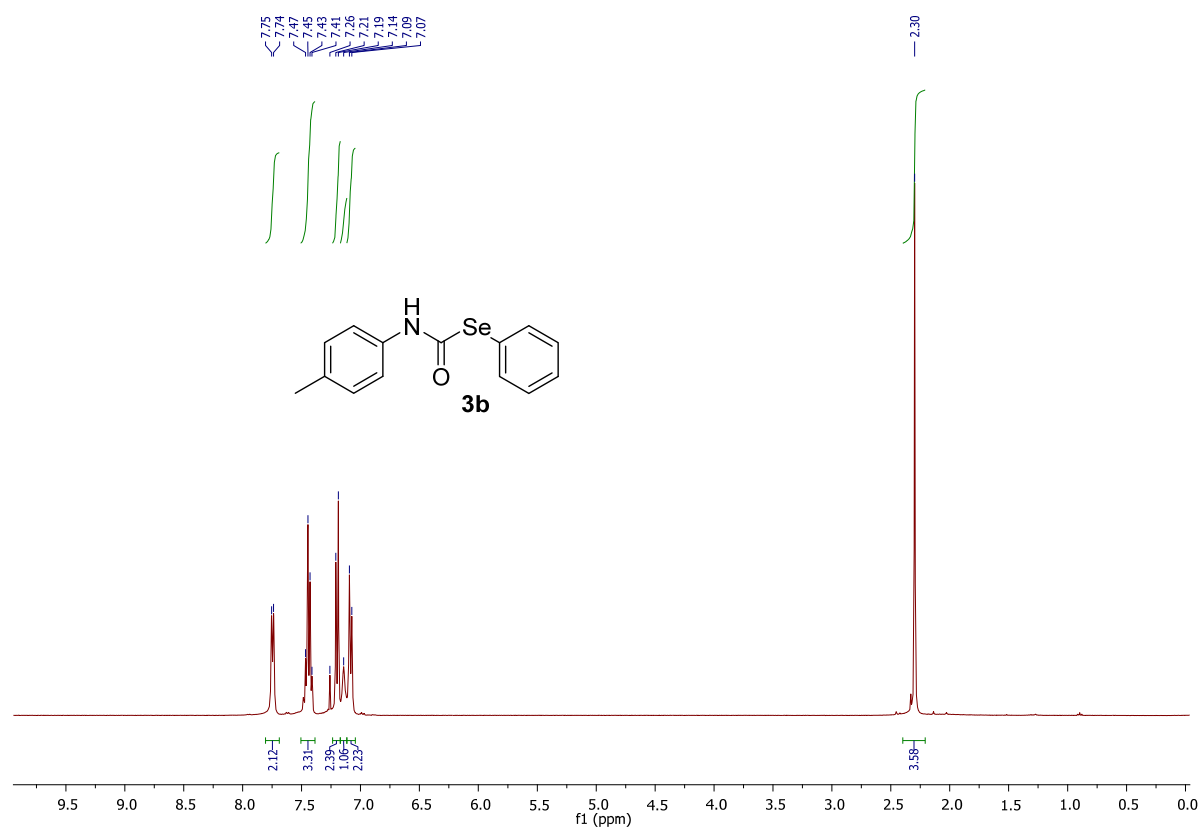Figure S10. <sup>1</sup>H NMR spectrum of compound **3b** (CDCl<sub>3</sub>, 400 MHz).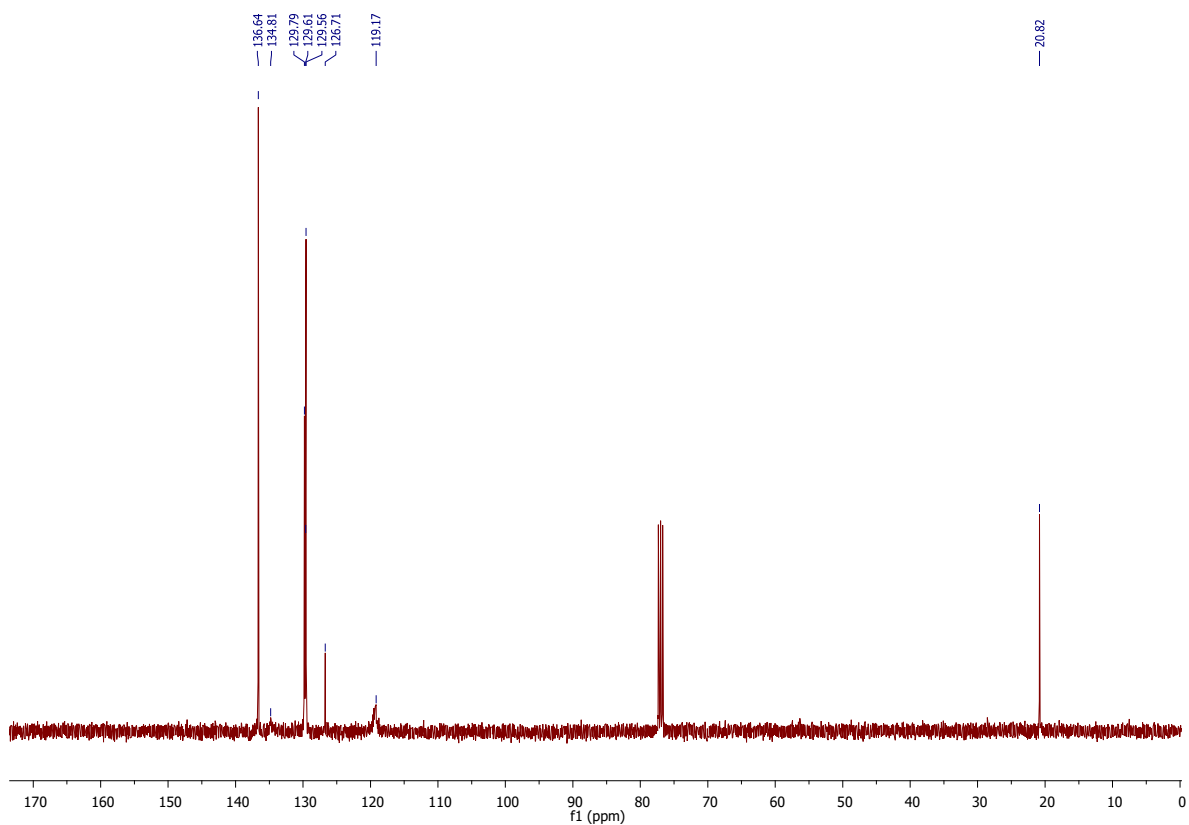Figure S11. <sup>13</sup>C NMR spectrum of compound **3b** (CDCl<sub>3</sub>, 100 MHz).



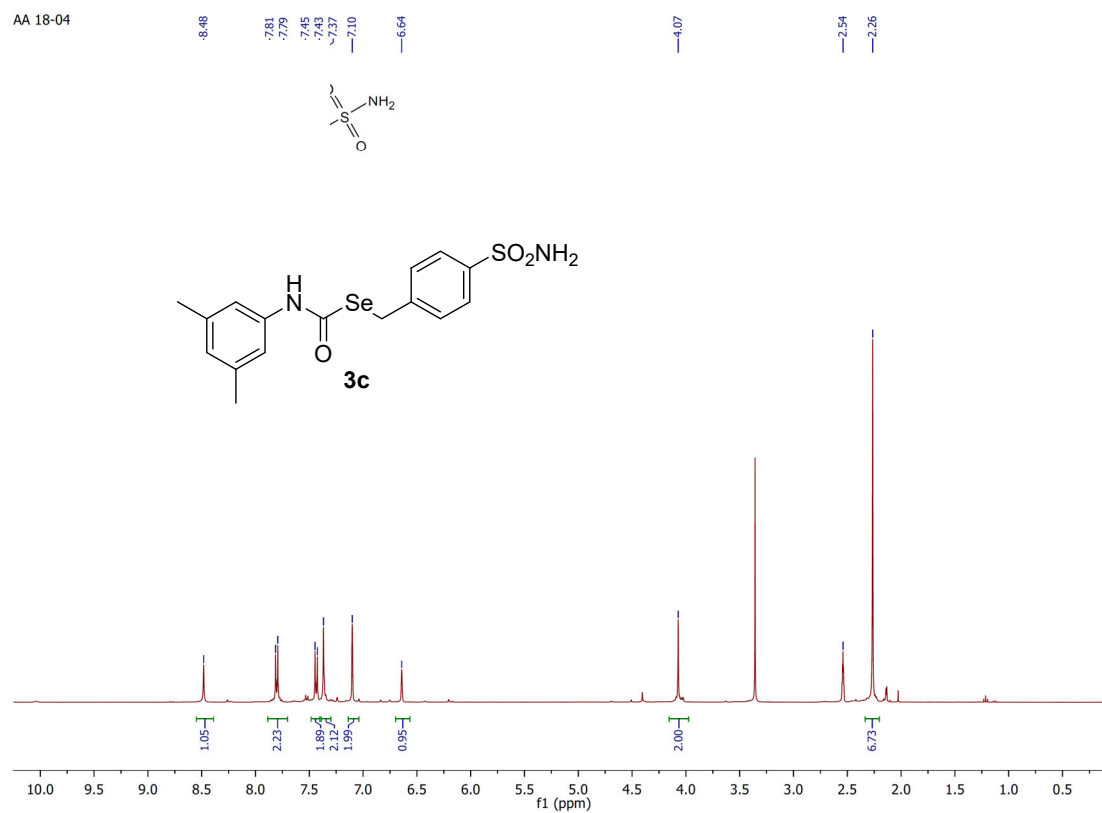

**Figure S12.**  $^1\text{H}$  NMR spectrum of compound **3c** ( $\text{DMSO-}d_6$ , 400 MHz).

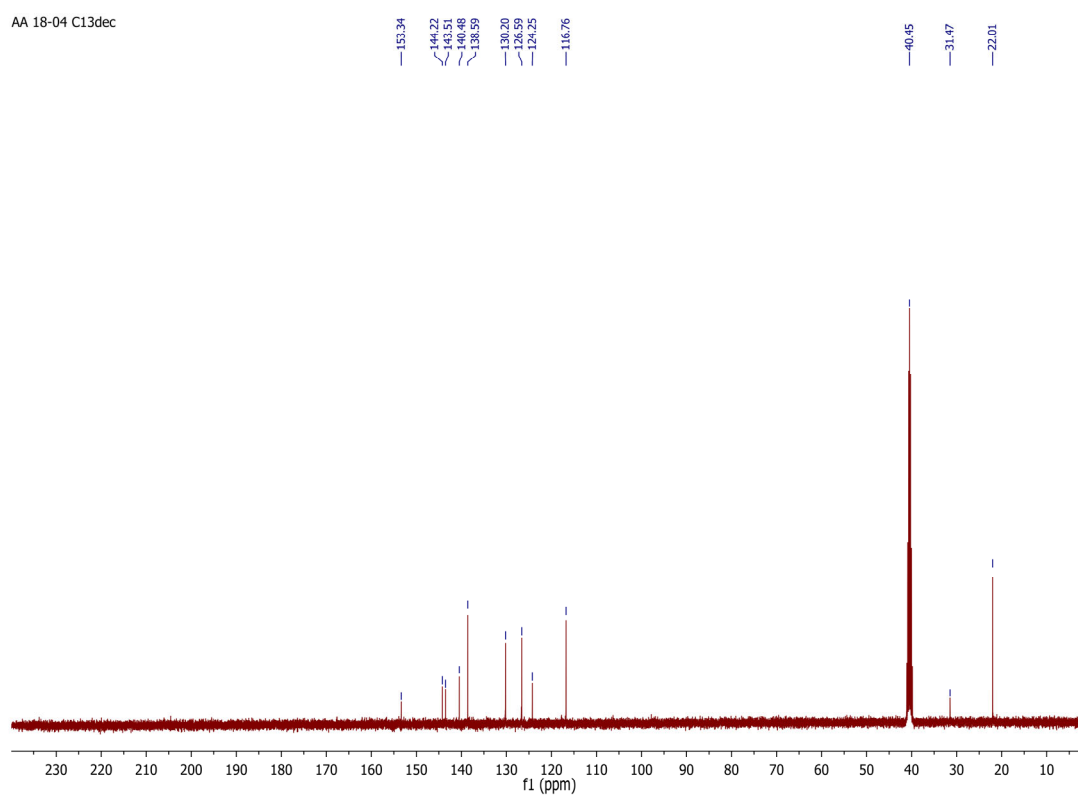

**Figure S13.**  $^{13}\text{C}$  NMR spectrum of compound **3c** ( $\text{DMSO-}d_6$ , 100 MHz).

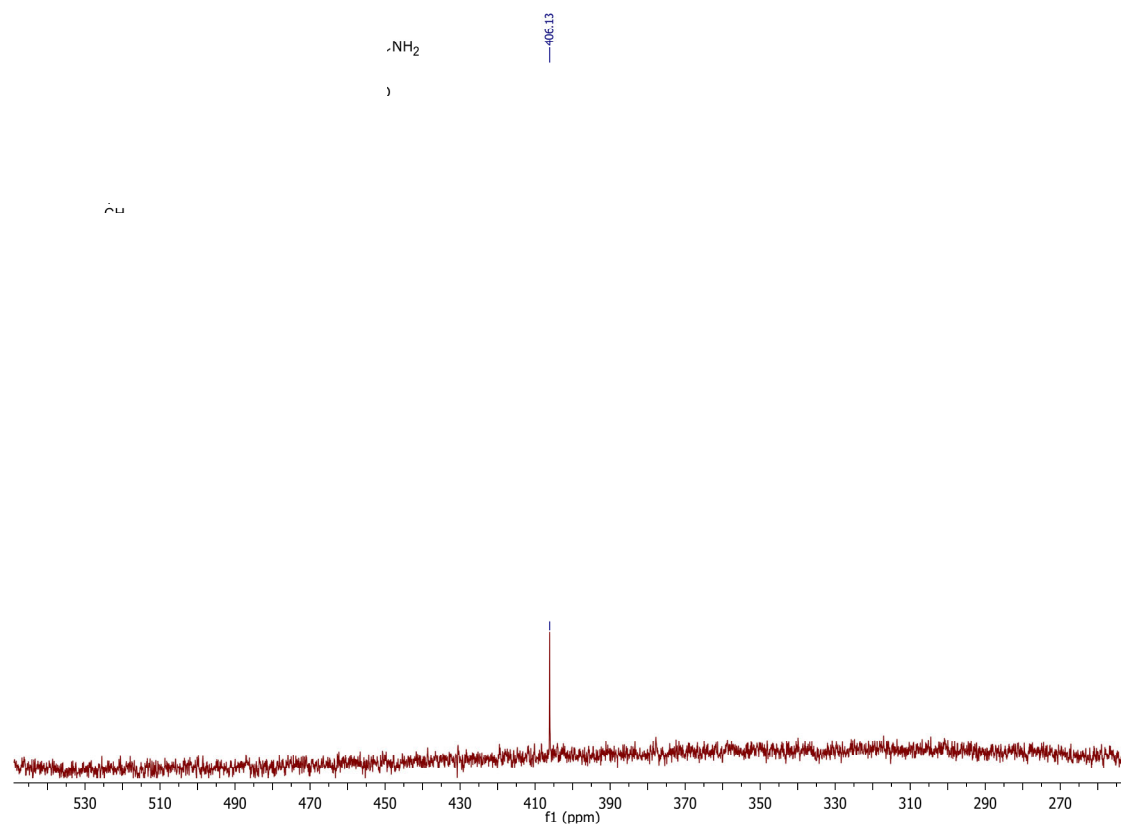

**Figure S14.**  $^{77}\text{Se}$  NMR spectrum of compound **3c** ( $\text{DMSO-}d_6$ , 76 MHz).

---

**Disclaimer/Publisher's Note:** The statements, opinions and data contained in all publications are solely those of the individual author(s) and contributor(s) and not of MDPI and/or the editor(s). MDPI and/or the editor(s) disclaim responsibility for any injury to people or property resulting from any ideas, methods, instructions or products referred to in the content.
